# Supplementary material for: Structured reporting for fibrosing lung disease: a model shared by radiologist and pulmonologist
Source: Springer Nature journal article supplement (doi:10.1007/s11547-017-0835-6), 2017-12-11
Supplement: MOESM1 [file 11547_2017_835_MOESM1_ESM.pdf]

**Supplementary Table 1 – Round 1: items proposed by the writing committee and rated by the radiology panellists (N=42)**

| <b>Structured Report Items</b>                                                                                       | <b>Essential</b> | <b>Optional</b> | <b>Not relevant</b> | <b>missing</b> | <b>To be outlined</b> | <b>To be given as free text</b> | <b>No preferences</b> |
|----------------------------------------------------------------------------------------------------------------------|------------------|-----------------|---------------------|----------------|-----------------------|---------------------------------|-----------------------|
| <b>Initial Considerations</b>                                                                                        |                  |                 |                     |                |                       |                                 |                       |
| CT protocol details                                                                                                  | 69,0%            | 11,9%           | 16,7%               | 2,4%           | 57,1%                 | 11,9%                           | 31%                   |
| Available clinical indication                                                                                        | <b>81,0%</b>     | 16,7%           | 2,4%                | 0%             | 23,8%                 | 52,4%                           | 23,8%                 |
| Comparison with prior CT examinations                                                                                | <b>100%</b>      | 0%              | 0%                  | 0%             | 42,9%                 | 33,3%                           | 23,8%                 |
| Differences in CT technique with prior examinations                                                                  | 66,7%            | 7,1%            | 23,8%               | 2,4%           | 23,8%                 | 33,3%                           | 42,9%                 |
| Motion artifacts                                                                                                     | <b>92,9%</b>     | 4,8%            | 2,4%                | 0%             | 47,6%                 | 28,6%                           | 23,8%                 |
| <b>HRCT Findings</b>                                                                                                 |                  |                 |                     |                |                       |                                 |                       |
| Comparison of CT findings with prior scan, indicating change of each HRCT finding                                    | <b>83,3%</b>     | 11,9%           | 4,8%                | 0,0%           | 33,3%                 | 38,1%                           | 28,6%                 |
| Initial assessment of signs lung fibrosis (honeycombing, traction bronchiectasis, signs of volume loss)              | <b>97,6%</b>     | 2,4%            | 0,0%                | 0,0%           | 69,5%                 | 23,8%                           | 16,7%                 |
| Confidence on honeycombing against traction bronchiectasis                                                           | 73,8%            | 16,7%           | 7,1%                | 2,4%           | 26,2%                 | 40,5%                           | 33,3%                 |
| Avoid description of the absent findings                                                                             | 57,1%            | 28,6%           | 14,3%               | 0,0%           | 28,6%                 | 31%                             | 40,4%                 |
| Description of all CT findings                                                                                       | 45,2%            | 26,2%           | 28,6%               | 0,0%           | 16,7%                 | 31%                             | 52,4%                 |
| Description of the most relevant CT findings only (e.g. honeycombing, traction bronchiectasis, signs of volume loss) | 66,7%            | 21,4%           | 11,9%               | 0,0%           | 19%                   | 35,7%                           | 45,2%                 |
| Disease distribution on both axial and cranio-caudal planes                                                          | <b>100,0%</b>    | 0,0%            | 0,0%                | 0,0%           | 78,6%                 | 7,1%                            | 14,3%                 |
| Differentiation between macro- and micro-cystic honeycombing                                                         | 28,6%            | 40,5%           | 28,6%               | 2,4%           | 52,4%                 | 4,8%                            | 42,9%                 |
| Description of the reticular opacities subtypes (e.g. interlobular or interlobular lines)                            | 59,5%            | 28,6%           | 9,5%                | 2,4%           | 66,7%                 | 7,1%                            | 26,2%                 |
| Emphysema subtype including the so-called airspace                                                                   | <b>90,5%</b>     | 4,8%            | 2,4%                | 2,4%           | 69,5%                 | 19%                             | 21,4%                 |

|                                                                                                 |              |       |       |      |       |       |       |
|-------------------------------------------------------------------------------------------------|--------------|-------|-------|------|-------|-------|-------|
| enlargement with fibrosis                                                                       |              |       |       |      |       |       |       |
| Quantitation of FLD extent as percentage of the lung volume                                     | 11,9%        | 57,1% | 28,6% | 2,4% | 50%   | 7,1%  | 42,9% |
| Quantitation of FLD extent according to three categories of severity                            | 69,0%        | 26,2% | 4,8%  | 0,0% | 66,7% | 2,4%  | 31%   |
| Quantitation of FLD extent for any disease OR for sarcoidosis and systemic sclerosis only       | 11,9%        | 57,1% | 28,6% | 2,4% | 50%   | 7,1%  | 42,9% |
| Quantitation of emphysema extent as percentage of the lung volume                               | 11,9%        | 57,1% | 28,6% | 2,4% | 50%   | 7%    | 43%   |
| Quantitation of emphysema extent according to three categories of severity                      | 64,3%        | 33,3% | 2,4%  | 0,0% | 66,7% | 4,8%  | 28,6% |
| Report air trapping only when expiratory CT scan is performed                                   | 57,1%        | 11,9% | 31,0% | 0,0% | 45,2% | 4,8%  | 50%   |
| Suggest air trapping also on inspiratory CT scan                                                | 73,8%        | 19,0% | 7,1%  | 0,0% | 47,6% | 21,4% | 31%   |
| Report enlarged pulmonary artery for any disease OR for sarcoidosis and systemic sclerosis only | <b>87,8%</b> | 9,8%  | 0,0%  | 2,4% | 52,4% | 4,8%  | 42,9% |
| Report enlarged lymph nodes                                                                     | <b>80,5%</b> | 17,1% | 0,0%  | 2,4% | 40,5% | 14,3% | 45,2% |
| <b>Conclusions</b>                                                                              |              |       |       |      |       |       |       |
| CT pattern                                                                                      | <b>97,6%</b> | 0,0%  | 0,0%  | 2,4% | 61,9% | 14,3% | 23,8% |
| Proposal for the subsequent diagnostic test                                                     | 40,5%        | 54,8% | 0,0%  | 5,0% | 45,2% | 26,2% | 28,6% |
| Indication for the timing of CT follow-up                                                       | 45,2%        | 47,6% | 0,0%  | 2,4% | 45,2% | 26,2% | 28,6% |

Note – CT = Computed Tomography; FLD = Fibrosing Lung Disease.

**Supplementary Table 2 – In Round 2 the radiology panelists: A) re-rated those items that did not reach the threshold for consensus in Round 1 and B) classified as ‘to be outlined’ or ‘to be given as free text’ those items that did reach the threshold for consensus on Round 1**

| Structured Report Items                                                                                              | Essential                                         | Optional | Not relevant | missing | To be outlined | To be given as free text | No preferences |
|----------------------------------------------------------------------------------------------------------------------|---------------------------------------------------|----------|--------------|---------|----------------|--------------------------|----------------|
| <b>Initial Considerations</b>                                                                                        |                                                   |          |              |         |                |                          |                |
| CT protocol details                                                                                                  | 51,2%                                             | 46,3%    |              | 2,4%    | 48,8%          | 2,5%                     | 51,2%          |
| Available clinical indication                                                                                        | <b>Reached threshold for consensus in Round 1</b> |          |              |         | <b>56,1%</b>   | 43,9%                    | 0,0%           |
| Comparison with prior CT examinations                                                                                | <b>Reached threshold for consensus in Round 1</b> |          |              |         | <b>75,6%</b>   | 24,4%                    | 0,0%           |
| Differences in CT technique with prior examinations                                                                  | 46,3%                                             | 53,7%    |              | 0,0%    | 36,6%          | 9,7%                     | 56,1%          |
| Motion artifacts                                                                                                     | <b>Reached threshold for consensus in Round 1</b> |          |              |         | <b>78,0%</b>   | 19,5%                    | 2,4%           |
| <b>CT Findings</b>                                                                                                   |                                                   |          |              |         |                |                          |                |
| Comparison of CT findings with prior scan, indicating change of each CT finding                                      | <b>Reached threshold for consensus in Round 1</b> |          |              |         | 41,5%          | <b>58,5%</b>             | 0,0%           |
| Initial assessment of signs lung fibrosis (honeycombing, traction bronchiectasis, signs of volume loss)              | <b>Reached threshold for consensus in Round 1</b> |          |              |         | <b>85,4%</b>   | 14,6%                    | 0,0%           |
| Confidence on honeycombing against traction bronchiectasis                                                           | 78,0%                                             | 17,1%    |              | 4,9%    | 29,3%          | 48,8%                    | 24,4%          |
| Avoid description of the absent findings                                                                             | 51,2%                                             | 46,3%    |              | 2,4%    | 39,0%          | 12,2%                    | 51,2%          |
| Description of all CT findings                                                                                       | 53,7%                                             | 43,9%    |              | 2,4%    | 19,5%          | 34,1%                    | 48,8%          |
| Description of the most relevant CT findings only (e.g. honeycombing, traction bronchiectasis, signs of volume loss) | 61,0%                                             | 39,0%    |              | 0,0%    | 41,5%          | 19,5%                    | 41,5%          |
| Disease distribution on both axial and cranio-caudal planes                                                          | <b>Reached threshold for consensus in Round 1</b> |          |              |         | <b>87,8%</b>   | 12,2%                    | 0,0%           |
| Differentiation between macro- and micro-cystic honeycombing                                                         | 24,4%                                             | 73,2%    |              | 2,4%    | 24,4%          | 0,0%                     | 78,1%          |
| Description of the reticular opacities subtypes (e.g. interlobular or interlobular lines)                            | 58,5%                                             | 39,0%    |              | 2,4%    | 46,3%          | 12,2%                    | 43,9%          |

|                                                                                                 |                                                   |       |  |      |              |       |       |
|-------------------------------------------------------------------------------------------------|---------------------------------------------------|-------|--|------|--------------|-------|-------|
| Emphysema subtype including the so-called airspace enlargement with fibrosis                    | <b>Reached threshold for consensus in Round 1</b> |       |  |      | <b>90,2%</b> | 9,8%  | 0,0%  |
| Quantitation of FLD extent as percentage of the lung volume                                     | 46,3%                                             | 51,2% |  | 2,4% | 78,1%        | 14,6% | 9,7%  |
| Quantitation of FLD extent according to three categories of severity                            | 65,9%                                             | 31,7% |  | 2,4% | 53,7%        | 12,2% | 36,6% |
| Quantitation of FLD extent for any disease OR for sarcoidosis and systemic sclerosis only       | 46,3%                                             | 51,2% |  | 2,4% | 21,9%        | 2,5%  | 78,1% |
| Quantitation of emphysema extent as percentage of the lung volume                               | 31,7%                                             | 68,3% |  | 0,0% | 26,8%        | 4,9%  | 70,7% |
| Quantitation of emphysema extent according to three categories of severity                      | 65,9%                                             | 34,1% |  | 0,0% | 58,5%        | 7,3%  | 36,6% |
| Report air trapping only when expiratory CT scan is performed                                   | 51,2%                                             | 46,3% |  | 2,4% | 43,9%        | 7,3%  | 51,2% |
| Suggest air trapping also on inspiratory CT scan                                                | 78,0%                                             | 22,0% |  | 0,0% | 53,7%        | 24,4% | 24,4% |
| Report enlarged pulmonary artery for any disease OR for sarcoidosis and systemic sclerosis only | <b>Reached threshold for consensus in Round 1</b> |       |  |      | <b>66,7%</b> | 23,8% | 9,5%  |
| Report enlarged lymph nodes                                                                     | <b>Reached threshold for consensus in Round 1</b> |       |  |      | <b>61,9%</b> | 28,9% | 9,5%  |
| <b>Conclusions</b>                                                                              |                                                   |       |  |      |              |       |       |
| CT pattern                                                                                      | <b>Reached threshold for consensus in Round 1</b> |       |  |      | <b>82,9%</b> | 17,1% | 0,0%  |
| Proposal for the subsequent diagnostic test                                                     | 46,3%                                             | 53,7% |  | 0,0% | 39,0%        | 7,3%  | 56,1% |
| Indication for the timing of CT follow-up                                                       | 46,3%                                             | 51,2% |  | 2,4% | 34,1%        | 12,2% | 56,1% |

Note – CT = Computed Tomography; FLD = Fibrosing Lung Disease.

**Supplementary Table 3 – In Round 3 the pulmonologists panelists: A) re-rated those items that did not reach the threshold for consensus in Round 1 and B) classified as ‘to be outlined’ or ‘to be given as free text’ those items that did reach the threshold for consensus on Round 1**

| Structured Report Items                                                                                              | Essential                      | Optional | Not relevant | missing | To be outlined | To be given as free text | No preferences |
|----------------------------------------------------------------------------------------------------------------------|--------------------------------|----------|--------------|---------|----------------|--------------------------|----------------|
| <b>Initial Considerations</b>                                                                                        |                                |          |              |         |                |                          |                |
| CT protocol details                                                                                                  | 33,3%                          | 66,7%    |              |         | 16,7%          | 16,7%                    | 66,7%          |
| Available clinical indication                                                                                        | <b>AGREE WITH RP CONSENSUS</b> |          |              |         |                |                          |                |
| Comparison with prior CT examinations                                                                                | <b>AGREE WITH RP CONSENSUS</b> |          |              |         |                |                          |                |
| Differences in CT technique with prior examinations                                                                  | 41,7%                          | 58,3%    |              |         | 25%            | 25%                      | 50%            |
| Motion artifacts                                                                                                     | <b>AGREE WITH RP CONSENSUS</b> |          |              |         |                |                          |                |
| <b>HRCT Findings</b>                                                                                                 |                                |          |              |         |                |                          |                |
| Comparison of CT findings with prior scan, indicating change of each HRCT finding                                    | <b>AGREE WITH RP CONSENSUS</b> |          |              |         |                |                          |                |
| Initial assessment of signs lung fibrosis (honeycombing, traction bronchiectasis, signs of volume loss)              | <b>AGREE WITH RP CONSENSUS</b> |          |              |         |                |                          |                |
| Confidence on honeycombing against traction bronchiectasis                                                           | 33,3%                          | 66,7%    |              |         | 25%            | 25%                      | 50%            |
| Avoid description of the absent findings                                                                             | 41,7%                          | 58,3%    |              |         | 25%            | 25%                      | 50%            |
| Description of all CT findings                                                                                       | 41,7%                          | 58,3%    |              |         | 25%            | 8,3%                     | 66,7%          |
| Description of the most relevant CT findings only (e.g. honeycombing, traction bronchiectasis, signs of volume loss) | 16,2%                          | 83,3%    |              |         | 8,3%           | 8,3%                     | 83,3%          |
| Disease distribution on both axial and cranio-caudal planes                                                          | <b>AGREE WITH RP CONSENSUS</b> |          |              |         |                |                          |                |
| Differentiation between macro- and micro-cystic honeycombing                                                         | 8,3%                           | 91,6%    |              |         | 8,3%           | 0,0%                     | 91,7%          |
| Description of the reticular opacities subtypes (e.g. interlobular or interlobular lines)                            | 25%                            | 75%      |              |         | 25%            | 0,0%                     | 75,0%          |
| Emphysema subtype including the so-called airspace enlargement with fibrosis                                         | <b>AGREE WITH RP CONSENSUS</b> |          |              |         |                |                          |                |

|                                                                                                 |                                |       |  |  |       |       |       |
|-------------------------------------------------------------------------------------------------|--------------------------------|-------|--|--|-------|-------|-------|
| Quantitation of FLD extent as percentage of the lung volume                                     | 100                            | 0%    |  |  | 0,0%  | 0,0%  | 100%  |
| Quantitation of FLD extent according to three categories of severity                            | 25%                            | 75%   |  |  | 16,7% | 8,3%  | 75,0% |
| Quantitation of FLD extent for any disease OR for sarcoidosis and systemic sclerosis only       | 25%                            | 75%   |  |  | 33,3% | 0,0%  | 66,7% |
| Quantitation of emphysema extent as percentage of the lung volume                               | 25%                            | 75%   |  |  | 16,7% | 8,3%  | 75,0% |
| Quantitation of emphysema extent according to three categories of severity                      | 100%                           | 0%    |  |  | 16,7% | 16,7% | 66,7% |
| Report air trapping only when expiratory CT scan is performed                                   | 41,7%                          | 58,3% |  |  | 16,7% | 33,3% | 50%   |
| Suggest air trapping also on inspiratory CT scan                                                | 41,7%                          | 58,3% |  |  | 25%   | 25%   | 50%   |
| Report enlarged pulmonary artery for any disease OR for sarcoidosis and systemic sclerosis only | <b>AGREE WITH RP CONSENSUS</b> |       |  |  |       |       |       |
| Report enlarged lymph nodes                                                                     | <b>AGREE WITH RP CONSENSUS</b> |       |  |  |       |       |       |
| Other ancillary findings                                                                        | <b>AGREE WITH RP CONSENSUS</b> |       |  |  |       |       |       |
| <b>Conclusions</b>                                                                              |                                |       |  |  |       |       |       |
| CT pattern                                                                                      | <b>AGREE WITH RP CONSENSUS</b> |       |  |  |       |       |       |
| Proposal for the subsequent diagnostic test                                                     | 33,3%                          | 66,7% |  |  | 16,7% | 16,7% | 66,7% |
| Indication for the timing of HRCT follow-up                                                     | 16,2%                          | 83,3% |  |  | 0.0%  | 16,7% | 83,3% |

Note – CT = Computed Tomography; FLD = Fibrosing Lung Disease.

**Supplementary Table 4 – Item proposed by the pulmonology panelists for the radiology panelists**

| <b>OPTION A + B (Essential for 85,7%)*</b>                                   |                                                                      |
|------------------------------------------------------------------------------|----------------------------------------------------------------------|
| <b>OPTION A (Essential for 14.3%)</b>                                        | <b>OPTION B (to be considered only in association with option A)</b> |
| UIP DEFINITE                                                                 | UNIDENTIFIABLE ASSOCIATIONS OR KNOWN CAUSES                          |
| UIP POSSIBLE                                                                 | CONNECTIVE TISSUE DISEASE                                            |
| UIP POSSIBLE OR DEFINITE WITH SIGNS OF ACUTE COMPLICATIONS (TO BE SPECIFIED) | ASBESTOSIS                                                           |
| NSIP                                                                         | CHRONIC HYPERSENSITIVITY PNEUMONITIS                                 |
| NSIP-OP                                                                      |                                                                      |
| FIBROSING SARCOIDOSIS                                                        |                                                                      |
| PPFE                                                                         |                                                                      |
| UNCLASSIFIABLE                                                               |                                                                      |

Note – NSIP = Non-Specific Interstitial Pneumonia; OP = organizing pneumonia; PPFE = Pleuroparenchymal Fibroelastosis; UIP = Usual Interstitial Pneumonia

\*The majority (85.7%) of the RPs
